# Supplementary material for: 4,4′-Bis(trifluoromethyl)-2,2′-bipyridine – a multipurpose ligand scaffold for lanthanoid-based luminescence/19F NMR probes
Source: Royal Society of Chemistry journal article supplement (doi:10.1039/c3dt50842k), 2013-01-01
Supplement: c3dt50842k.pdf [file c3dt50842k.pdf]

# **4,4'-Bis(trifluoromethyl)-2,2'-Bipyridine – A Multipurpose Ligand Scaffold for Lanthanoid-Based Luminescence/<sup>19</sup>F NMR Probes**

Tuba Güden-Silber, Kathrin Klein and Michael Seitz\*

Inorganic Chemistry I, Department of Chemistry and Biochemistry,  
Ruhr-University Bochum, 44780 Bochum, Germany

Email: michael.seitz@rub.de. Fax: ++49 (0)234 32-14378.

## **Supporting Information**

|   | Table of Contents                           | Page |
|---|---------------------------------------------|------|
| 1 | Average Tb-F Distances in Tb-7              | S2   |
| 2 | <sup>19</sup> F NMR Relaxation Measurements | S3   |

## 1 Average Tb-F Distances in Tb-7

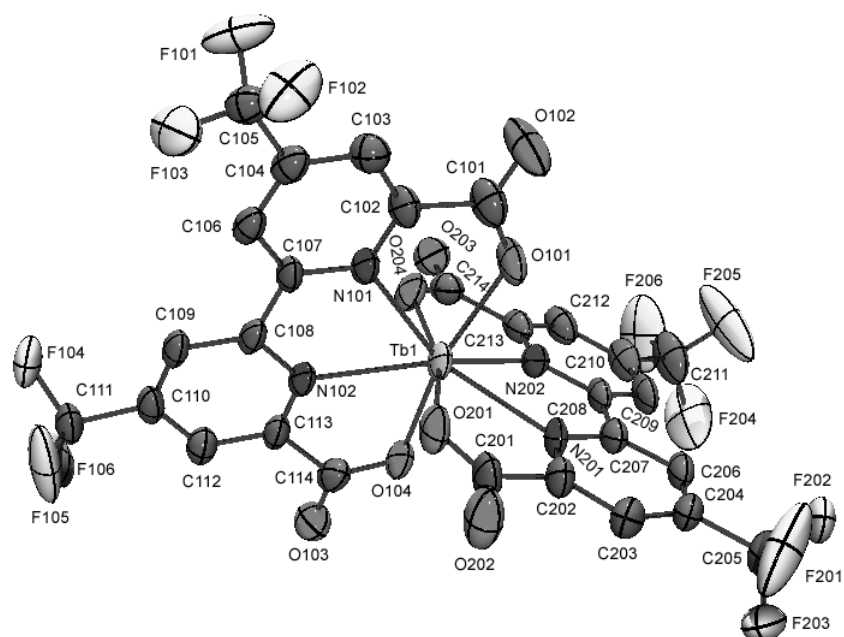

**Figure S1.** Thermal ellipsoid plot for **Tb-7**. The hydrogen atoms and the Et<sub>3</sub>NH<sup>+</sup> cation are omitted for clarity.

$$\text{Weighed average: } r_{\text{mean}} = \sum_{i=1}^n w_i \cdot r_i \quad \left( \text{with } w_i = \frac{(r_i)^{-6}}{\sum_{j=1}^m (r_j)^{-6}} \right)$$

Distances Tb-F in Å:

Tb1–F101: 7.414

Tb1–F102: 7.247

Tb1–F103: 7.356

Tb1–F104: 7.419

Tb1–F105: 7.286

Tb1–F106: 7.367

Tb1–F201: 7.293

Tb1–F202: 7.344

Tb1–F203: 7.428

Tb1–F204: 7.358

Tb1–F205: 7.338

Tb1–F206: 7.359

$$r_{\text{mean}} = 7.35 \text{ Å}$$

## 2 $^{19}\text{F}$ NMR Relaxation Measurements

Fluorine NMR measurements were performed using a Bruker DPX-250 (5.87 T,  $^{19}\text{F}$ : 235 MHz) spectrometer. Longitudinal relaxation times  $T_1$  were determined at 298K with solutions of **RE-7** (1-2 mM) in HEPES buffer (10 mM, pH 7.4) using standard inversion-recovery techniques.  $T_1$  values were obtained by fitting the data with an exponential function (Levenberg-Marquardt algorithm on  $\chi^2$ ).

Representative inversion-recovery plots for **RE-7** (HEPES buffer, pH 7.4, 298 K) are shown in Figures S2-S4:

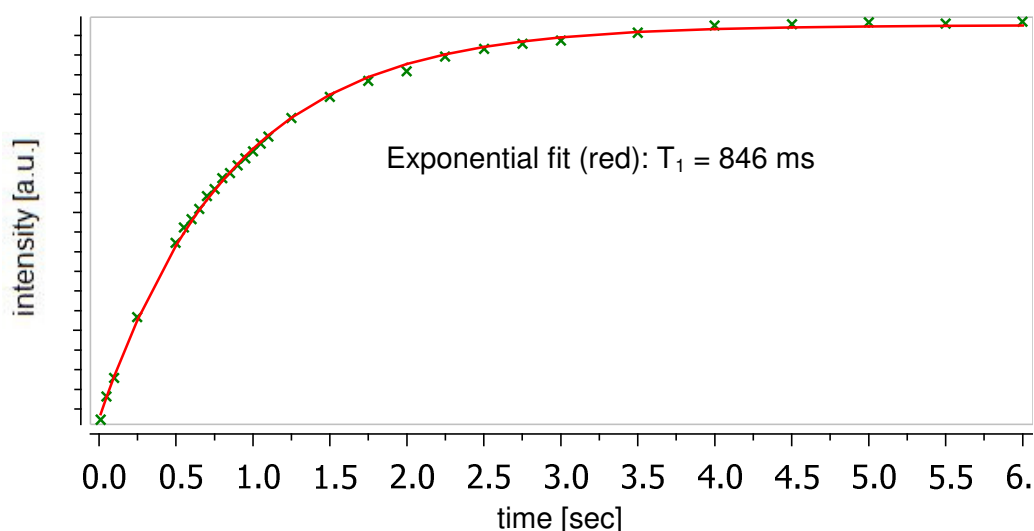

**Figure S2.** Inversion-recovery profile of **Y-7** with exponential fit (red).

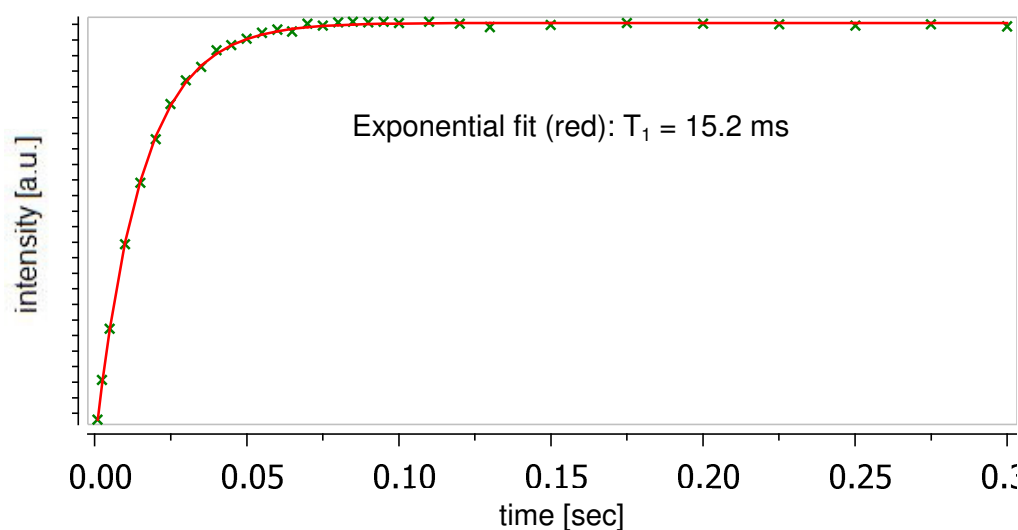

**Figure S3.** Inversion-recovery profile of **Tb-7** with exponential fit (red).

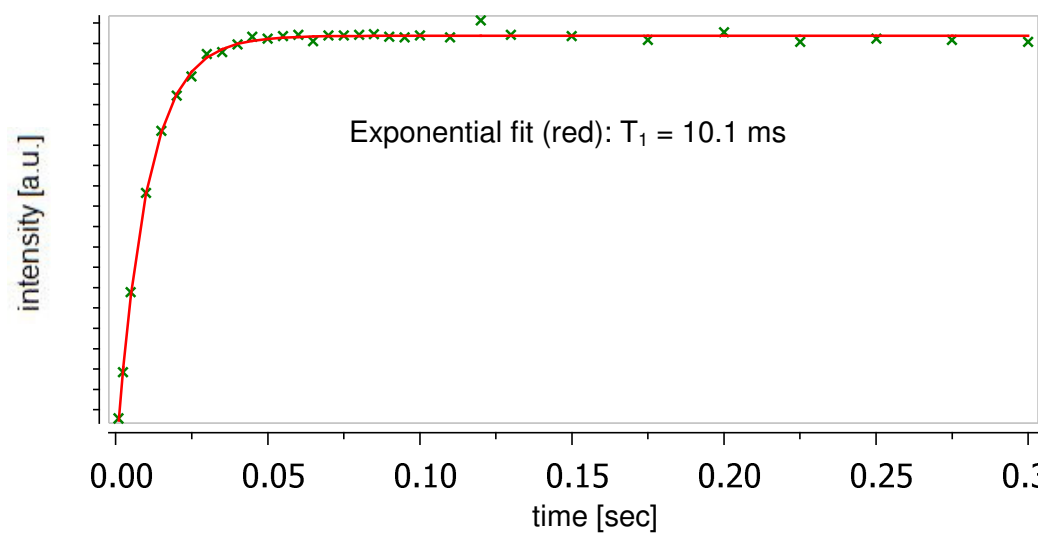

**Figure S4.** Inversion-recovery profile of **Dy-7** with exponential fit (red).
